# Supplementary material for: Designer porous antibacterial membranes derived from thermally induced phase separation of PS/PVME blends decorated with an electrospun nanofiber scaffold
Source: Royal Society of Chemistry journal article supplement (doi:10.1039/c5ra24084k), 2016-01-01
Supplement: c5ra24084k1.pdf [file c5ra24084k1.pdf]

## Designer porous antibacterial membranes derived from thermally induced phase separation of PS/PVME blends decorated with electrospun nanofiber scaffold

Priti Xavier, Shubham Jain, Vijay Srinivas, Kaushik Chatterjee, Suryasarathi Bose\*

Department of Materials Engineering, Indian Institute of Science Bangalore-560012

### Supporting Information

#### *Evolution of Morphology*

The evolution of morphology was assessed by *insitu* measurements in POM from homogeneous regime  $\sim 170$  °C to 250 °C (See figure S1). It was observed that the size of the PVME domains is nearly 100  $\mu\text{m}$  at temperature close to 210 °C. Hence, the temperature for annealing was chosen as 190 °C, well before the coarsening of the droplets. The samples were annealed for different times spans to obtain the optimum droplet size for the flux comparable to the commercial membranes.

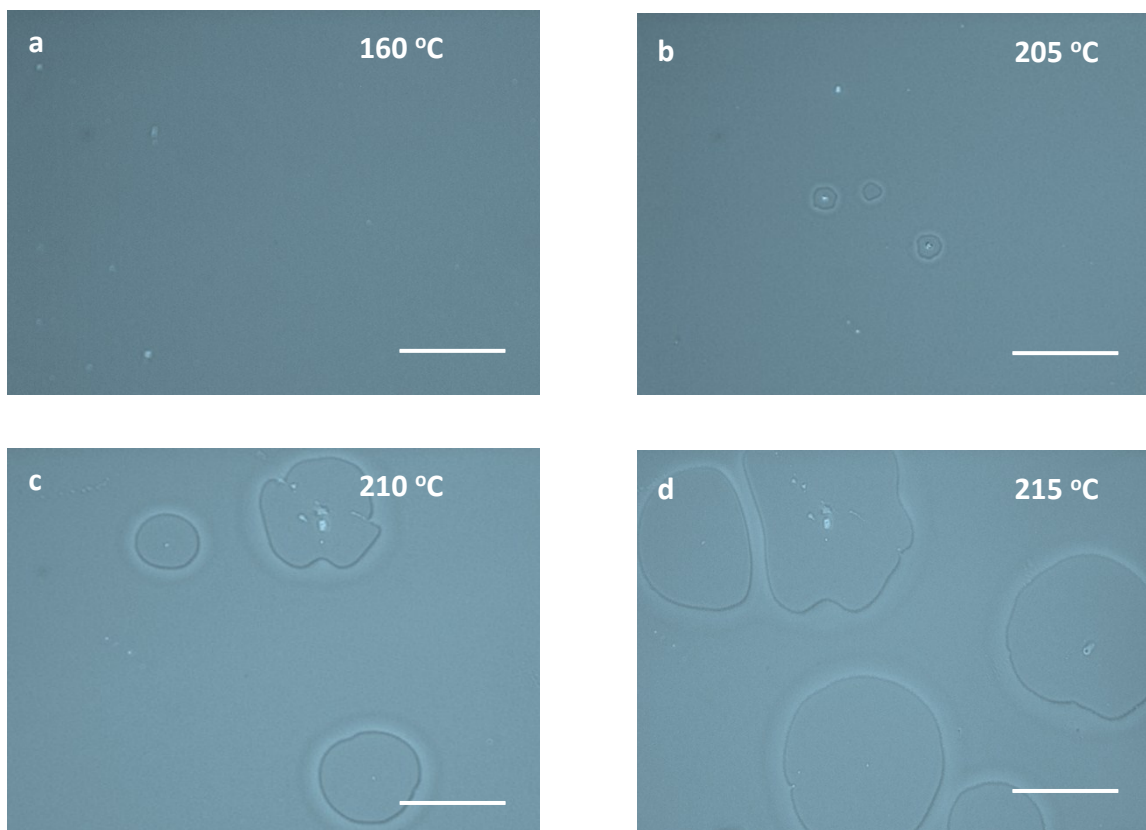

**Figure S1: POM images for neat 90/10 PS/PVME blends at (a) 160 °C and (b) 205 °C. (The scale bar corresponds to 100µm).**

The SEM image of the as pressed sample, where pores can not be seen, is shown in figure S2.

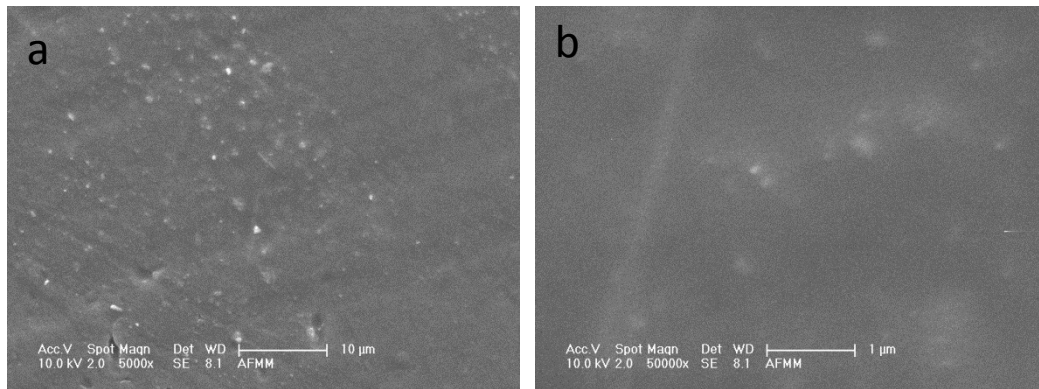

**Figure S2: SEM images of the compression moulded sample without pores**

The comparison of the trans-membrane flux in the case of the samples annealed for 45 minutes and 1 h has been shown in figure S3.

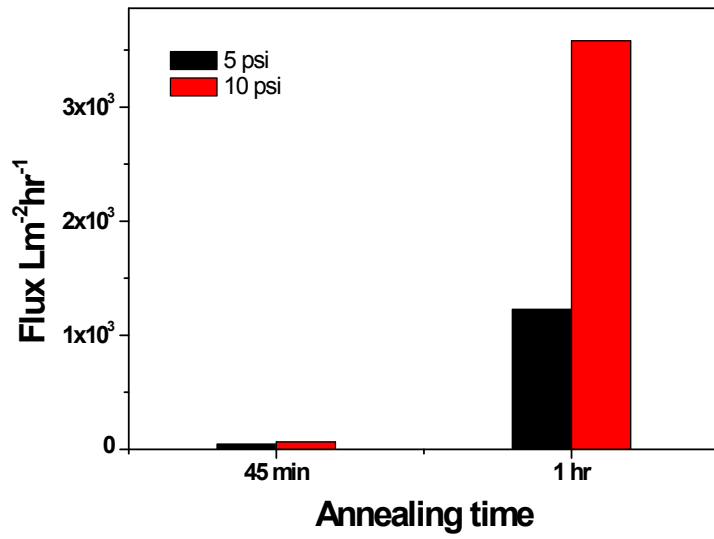

**Figure S3: Comparison of the trans-membrane flux in the case of the samples annealed for 45 minutes and 1 hr.**
